# Supplementary material for: Correlation Analysis between Volatile Compounds and Quality Attributes in Pork Tenderloin in Response to Different Stir-Frying Processes
Source: MDPI journal article supplement (doi:10.3390/foods12234299), 2023-11-28
Supplement: s1 [file s1]

**Table S1.** Sensory evaluation standard for stir-fried pork tenderloin

| Sensory attributes | Descriptors               | Scores |
|--------------------|---------------------------|--------|
| color              | golden                    | 7-9    |
|                    | yellow or light brown     | 4-6    |
|                    | white or dark brown       | 1-3    |
| texture            | moderately tender         | 7-9    |
|                    | medium tough or tender    | 4-6    |
|                    | extremely tough or tender | 1-3    |
| aroma              | rich aroma                | 7-9    |
|                    | common aroma              | 4-6    |
|                    | light aroma               | 1-3    |
| overall flavor     | good flavor               | 7-9    |
|                    | general flavor            | 4-6    |
|                    | poor flavor               | 1-3    |
